# Supplementary material for: The Immunogenicity of a VLP-based Malaria Vaccine Targeting CSP in Pregnant and Neonatal Mice
Source: MDPI journal article supplement (doi:10.3390/biom13020202), 2023-01-19
Supplement: s1 [file s1]

## Supplementary Information

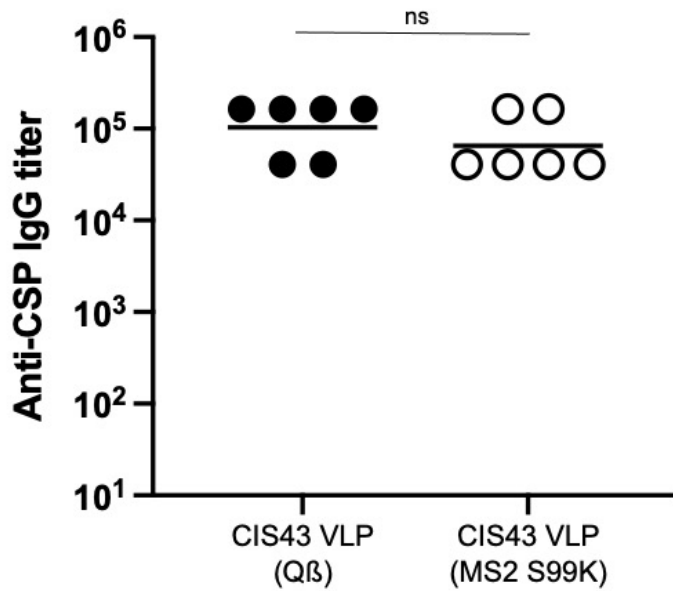

**Supplemental Figure S1.** CIS43 displayed on Q $\beta$  VLPs and MS2 S99K VLPs elicit similar antibody responses. Adult mice received three immunizations (at three-week intervals) with 5  $\mu$ g of CIS43 VLPs or MS2-S99K CIS43 VLPs. Sera were collected two weeks after the final immunization and anti-CSP IgG endpoint dilution titers were measured by ELISA. ns, not significant.
